# Supplementary material for: The excited state dipole moments of betaine pyridinium investigated by an innovative solvatochromic analysis and TDDFT calculations
Source: Royal Society of Chemistry journal article supplement (doi:10.1039/c1cp20920e), 2011-01-01
Supplement: c1cp20920e.pdf [file c1cp20920e.pdf]

**The excited state dipole moments of betaine pyridinium  
investigated by an innovative solvatochromic analysis and  
TDDFT calculations.**

**Supporting Info**

*Zuzanna Pawlowska, Aude Lietard, Stéphane Aloïse\*, Michel Sliwa, Abdenacer Idrissi,  
Olivier Poizat and Guy Buntinx.*

Laboratoire de Spectrochimie Infrarouge et Raman (UMR 8516 du CNRS), Université des  
Sciences et Technologies de Lille, Bat C5, 59655 Villeneuve d'Ascq Cedex, France.

*Stéphanie Delbaere*

Université Lille Nord de France, UDSL, Laboratoire de Spectrochimie Infrarouge et Raman  
(UMR 8516 du CNRS), 3 rue du Professeur Laguesse BP83, F-59006 Lille, France.

*Aurélie Perrier, François Maurel*

Laboratoire Interfaces, Traitements, Organisation et Dynamique des Systèmes, CNRS UMR  
7086, Université Paris Diderot, Bât. Lavoisier, 15 rue Jean Antoine de Baif, 75205 Paris  
Cedex 13, France.

*Patrice Jacques*

Ecole Nationale Supérieure de Chimie de Mulhouse, Université de Haute-Alsace, 3 rue Alfred  
Werner, 68093 Mulhouse, France

*Jiro Abe,*

Department of Chemistry, School of Science and Engineering, Aoyama Gakuin University  
5-10-1 Fuchinobe, Sagamihara, Kanagawa 229-8558, Japan.

\*stephane.aloise@univ-lille1.fr

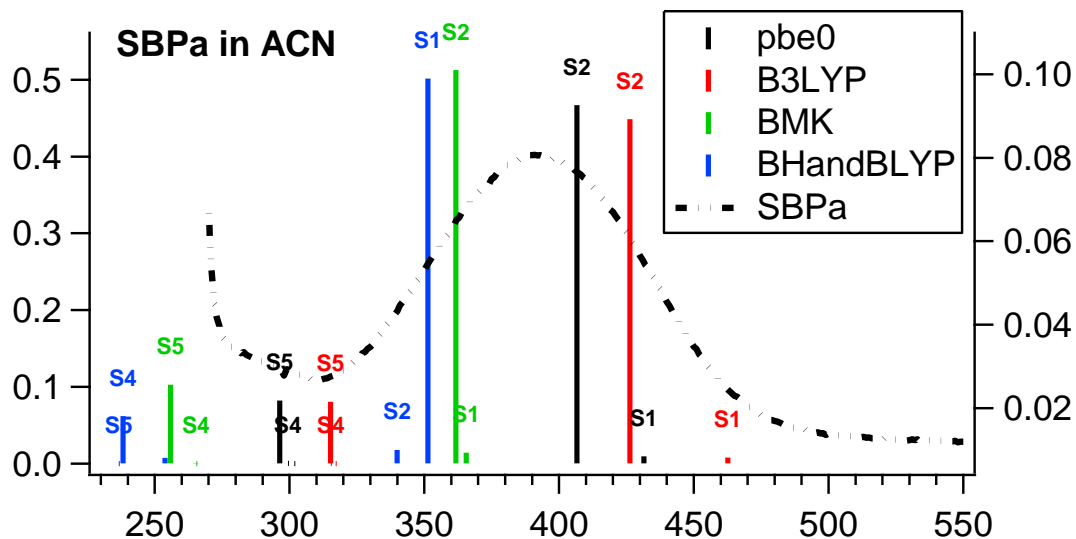

Figure S11. Absorption spectrum of SBPa and PCM-TD-/6-311++G(2d,p)//PBE0/6-311G(d) oscillator strength for different functionals PBE0, B3LYP, BMK, BHandBLP in acetonitrile.

|                 | ACN                      |                            | THF                      |                            | Toluene                  |                            |
|-----------------|--------------------------|----------------------------|--------------------------|----------------------------|--------------------------|----------------------------|
| Exp             | 3.1872                   | $\Delta_{\text{exp-theo}}$ | 2.9590                   | $\Delta_{\text{exp-theo}}$ | 2.8307                   | $\Delta_{\text{exp-theo}}$ |
| B3LYP (20%)     | 2.9085 (S <sub>2</sub> ) | 0.2787                     | 2.8019 (S <sub>2</sub> ) | 0.1571                     | 2.5719 (S <sub>2</sub> ) | 0.2588                     |
| PBE0 (25%)      | 3.0490 (S <sub>2</sub> ) | 0.1382                     | 2.9353 (S <sub>2</sub> ) | 0.0237                     | 2.6828 (S <sub>2</sub> ) | 0.1479                     |
| BMK (42%)       | 3.4279 (S <sub>2</sub> ) | -0.2407                    | 3.3022 (S <sub>2</sub> ) | -0.3432                    | 3.0032 (S <sub>2</sub> ) | -0.1725                    |
| BHandHLYP (50%) | 3.5291 (S <sub>1</sub> ) | -0.3419                    | 3.3965 (S <sub>1</sub> ) | -0.4375                    | 3.0672 (S <sub>1</sub> ) | -0.2365                    |

Table S11: Experimental and TDDFT theoretical CT band position in eV for different functionals. The main electronic state involved is indicated in parentheses.

|      | Basis         | Vaccum | THF  | ACN  |
|------|---------------|--------|------|------|
| PBE0 | 6-311++g(d,p) | 4.92   | 4.52 | 4.74 |
|      | 6-311g(d,p)   | 4.61   | 4.95 | 4.83 |
|      | 6-31g         | 4.66   | 4.67 | 4.62 |

Table S12: DFT/PCM Calculated Onsager radii (in Å) for SBPa in vacuum, in THF, and in acetonitrile using the PBE0 functional with different basis sets.

## INNOVATIVE PHYSICAL SOLVATOCHROMIC DATA TREATMENT

The inputs of our algorithm are the experimental solvatochromic data  $\{v_{Abs}^{sol}\}$  or  $\{v_{Fluo}^{sol}\}$  and the solvent properties  $n$  and  $\epsilon$  while the adjustable parameters are the molecular polarizability  $\alpha$  and gas phase absorption/emission band maxima  $v_{Abs}^{gaz}/v_{Fluo}^{gaz}$ . The main idea of this approach is based on the principle that the best set of  $v_{Abs/Fluo}^{gaz}$  and  $\alpha$  parameters should lead to the most accurate non-linear fit of the solvatochromic data according to eq 5 (main article). Thus, we have imagined to plot in a 2D map the variation of the mean square coefficient  $\chi^2$  characterizing this non linear fit as a function of both the  $v_{Abs/Fluo}^{gaz}$  and  $\alpha$  values. Analyzing this 2D map should allow to visualize directly the optimum values of  $v_{Abs/Fluo}^{gaz}$  and  $\alpha$ . The algorithm core (double implementation structure), illustrated in figure SI1, can be described as follows:

**STEP 1:** the experimental data  $\{v_{Abs}^{sol}\}$  or  $\{v_{Fluo}^{sol}\}$  measured for a given set of solvents  $\{n, \epsilon\}$  are selected. Appropriate intervals for the adjustable parameters  $v_{Abs/Fluo}^{gaz}$  and  $\alpha$  are chosen. The polarizability is scanned within the  $[0; 1.2]$  interval while  $v_{Abs}^{gaz}$  and  $v_{Fluo}^{gaz}$  are scanned within the  $[15000; 28000 \text{ cm}^{-1}]$  and  $[10000; 17000 \text{ cm}^{-1}]$  frequency intervals, respectively.

### **STEP 2:**

a) a pair of  $v_{Abs/Fluo}^{gaz}$  and  $\alpha$  values is implemented in the loop. The 2 functions  $g(n, \epsilon, \alpha)$  and  $h(n, \alpha)$  (eqs. 2 and 3) and  $\Delta v_{Abs/Fluo} = v_{Abs/Fluo}^{sol} - v_{Abs/Fluo}^{gaz}$  (left side of eq. 4) are determined.

b) Then the  $\Delta v_{Abs/Fluo}$  values are plotted for all solvents as a function of  $g(n, \epsilon, \alpha)$  and  $h(n, \alpha)$  in a 3D graph  $\Delta v_{Abs/Fluo} = f[g(n, \epsilon, \alpha), h(n, \alpha)]$ .

c) Non-linear fits of  $\Delta v_{Abs/Fluo}$  by the equation plane  $K_1 g(n, \epsilon, \alpha) - K_2 h(n, \alpha)$  (eq. 5) is performed and the fitted parameters  $K_1$  and  $K_2$  as well as  $\chi^2$  are stored.

Then the  $v_{Abs/Fluo}^{gaz}$  and  $\alpha$  values are incremented step by step within their respective intervals. For each set of values, the above operations a – c listed in step 2 are repeated until the overall chosen ranges are spanned by the procedure.

**STEP 3:** a 2D map of  $\chi^2$  as a function of the  $v_{Abs/Fluo}^{gaz}$  and  $\alpha$  values is built and its minimum value is detected. Alternatively, other interesting regions of the 2D map can be tested.

**STEP 4:** for the selected points chosen above,  $\mu_g(S_0)$ ,  $\mu_e(S_2)$  (abs) or  $\mu_e(S_1)$   $\mu_g(S_0')$  (emiss) are computed from  $K_1$  and  $K_2$  according to eq.6-9 after implementing an Onsager radius of 4.75 Å (DFT calculations; see table SI2) and a phase value  $\theta = 0$  or  $\pi$ .

| <b>Solvatochromic Data Treatment Algorithm</b>                                                                                                                                                                                                                                                                                                                                                                                                                                                                                            |                                                                                                                                                                                                                                                                                                                                                                                                                                                                                                                                                                                                                                                                                                                                                                                                                                  |
|-------------------------------------------------------------------------------------------------------------------------------------------------------------------------------------------------------------------------------------------------------------------------------------------------------------------------------------------------------------------------------------------------------------------------------------------------------------------------------------------------------------------------------------------|----------------------------------------------------------------------------------------------------------------------------------------------------------------------------------------------------------------------------------------------------------------------------------------------------------------------------------------------------------------------------------------------------------------------------------------------------------------------------------------------------------------------------------------------------------------------------------------------------------------------------------------------------------------------------------------------------------------------------------------------------------------------------------------------------------------------------------|
| <b>GOAL= determinations of 2 dipole moments</b>                                                                                                                                                                                                                                                                                                                                                                                                                                                                                           |                                                                                                                                                                                                                                                                                                                                                                                                                                                                                                                                                                                                                                                                                                                                                                                                                                  |
| <div><div>3 inputs:</div><div>2 adjustable parameters:</div></div> <div><div>Set of solvent values: <math>\{n, \epsilon\}</math></div><div>Solvatochromic data: <math>\{v_{Abs}^{sol}\}</math> or <math>\{v_{Fluo}^{sol}\}</math></div><div><math>v_{Abs}^{gaz}</math> or <math>v_{Fluo}^{gaz}</math> (gas phase!)</div><div>and polarizability <math>\alpha</math>.</div></div> <div><div>2 outputs:</div><div><math>\mu_g(S_0), \mu_e(S_2)</math> (absorption) or</div><div><math>\mu_e(S_1), \mu_g(S_0')</math> (emission)</div></div> |                                                                                                                                                                                                                                                                                                                                                                                                                                                                                                                                                                                                                                                                                                                                                                                                                                  |
| <b>STEP 1</b>                                                                                                                                                                                                                                                                                                                                                                                                                                                                                                                             | One chooses appropriate intervals for $[v_{Abs/Fluo}^{gaz}]$ and $[\alpha]$ .                                                                                                                                                                                                                                                                                                                                                                                                                                                                                                                                                                                                                                                                                                                                                    |
| <b>STEP 2</b>                                                                                                                                                                                                                                                                                                                                                                                                                                                                                                                             | <div>a) For a pair of values <math>(v_{Abs/Fluo}^{gaz}; \alpha)</math> one computes:<ul style="list-style-type: none"><li><math>g(n, \epsilon, \alpha)</math></li><li><math>h(n, \alpha)</math></li><li><math>\Delta v_{Abs/Fluo} = v_{Abs/Fluo}^{sol} - v_{Abs/Fluo}^{gaz}</math></li></ul></div> <div>b) one plots 3D graph<br/><math>\Delta v_{Abs/Fluo} = f[g(n, \epsilon, \alpha), h(n, \alpha)]</math></div> <div>c) Non-linear fit: <math>\Delta v_{abs/fluo} = K_1 g(n, \epsilon, \alpha) - K_2 h(n, \alpha)</math><br/><math>\Rightarrow K_1, K_2</math> and <math>\chi^2</math> are stored</div> <div>operation a)-c) repeated until both <math>[v_{Abs/Fluo}^{gaz}]</math> and <math>[\alpha]</math> are spanned</div> <div>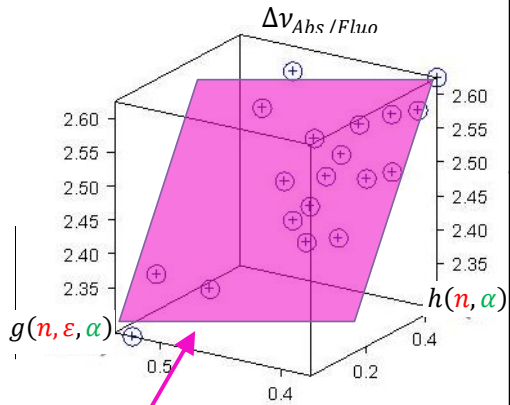</div> |
| <b>STEP 3</b>                                                                                                                                                                                                                                                                                                                                                                                                                                                                                                                             | <div>2D Map are plotted<br/><math>\chi^2 = f(v_{Abs/Fluo}^{gaz}; \alpha)</math></div> <div><math>\Rightarrow</math> identification of true minimum or other relevant points</div> <div></div>                                                                                                                                                                                                                                                                                                                                                                                                                                                                                                                                                |
| <b>STEP 4</b>                                                                                                                                                                                                                                                                                                                                                                                                                                                                                                                             | <div>For the selected points :</div> <div><div><ul style="list-style-type: none"><li><math>K_1, K_2</math></li><li>Onsager radius=4.75 Å</li><li>Phase <math>\theta=0</math> or <math>\pi</math></li></ul></div><div><div>absorption</div><div>emission</div></div><div><math display="block">\begin{cases} \mu_g(S_0) = \frac{1}{\sqrt{4\pi\epsilon_0 a^3}} \frac{K_1}{\sqrt{2(K_1 - K_2)}} \\ \mu_e(S_2) = \frac{(cos\theta)^{-1}}{\sqrt{4\pi\epsilon_0 a^3}} \frac{K_2}{\sqrt{2(K_1 - K_2)}} \\ \mu_g(S_0') = \frac{1}{\sqrt{4\pi\epsilon_0 a^3}} \frac{2K_2 - K_1}{\sqrt{2(K_1 - K_2)}} \\ \mu_e(S_1) = \frac{(cos\theta)^{-1}}{\sqrt{4\pi\epsilon_0 a^3}} \frac{K_1}{\sqrt{2(K_1 - K_2)}} \end{cases}</math></div></div>                                                                                                    |

figure SI2. Overall illustration of the 4 step algorithm related to the Innovative physical solvatochromic data treatment.

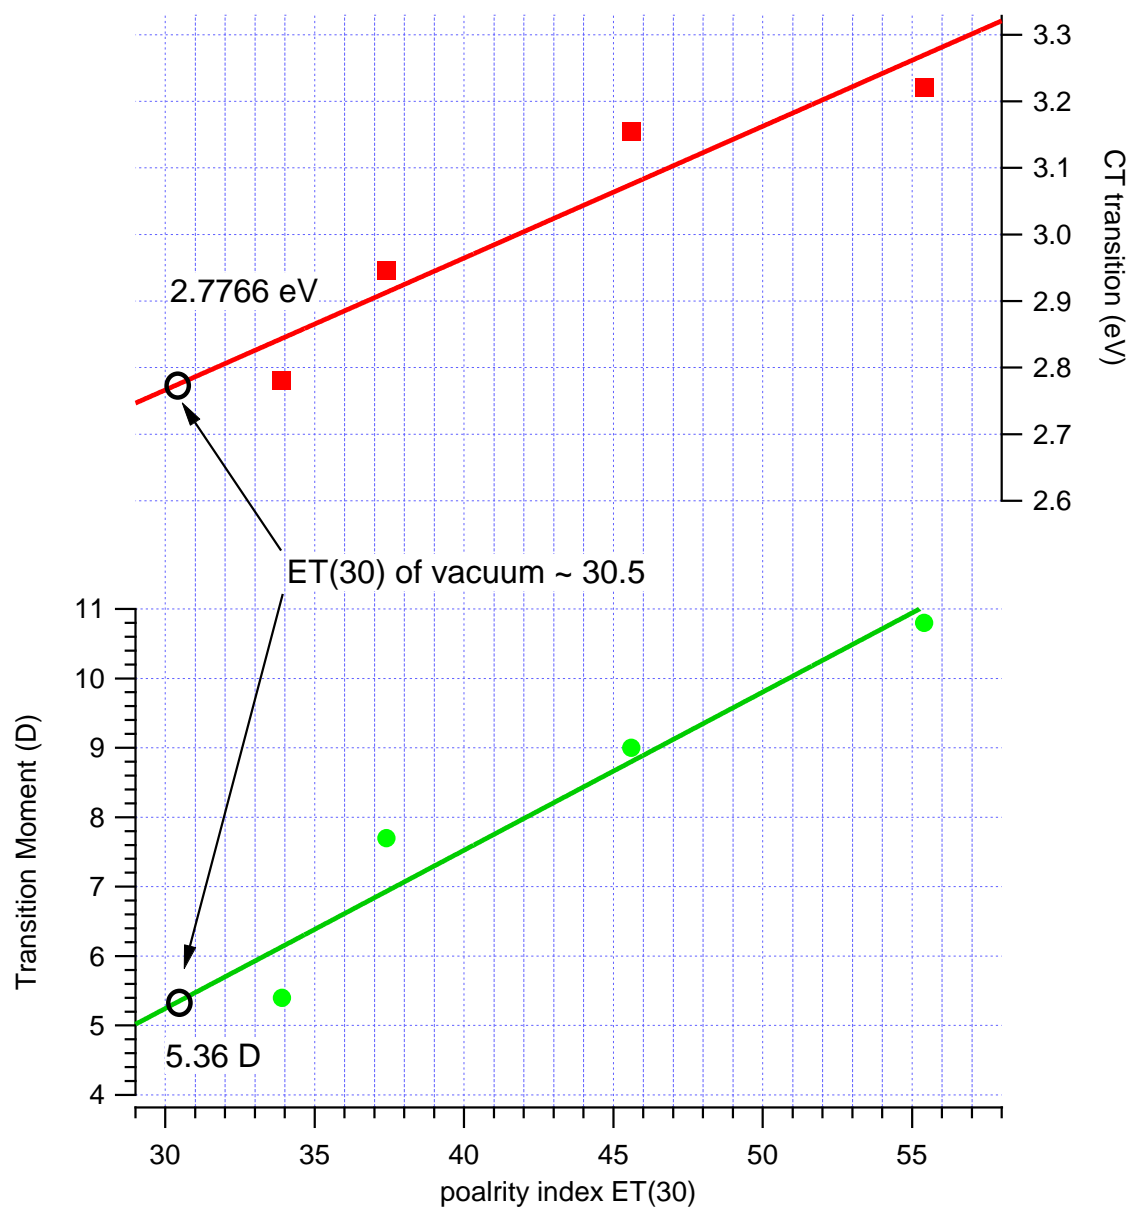

Figure S13. Transition energy and transition moment of the solvatochromic CT band of SBPa (see fig 1 and Table 2) in Toluene, THF, ACN and MeOH. The extrapolated values for vacuum are indicated.
